# Supplementary material for: High-performance supercapacitor and lithium-ion battery based on 3D hierarchical NH4F-induced nickel cobaltate nanosheet–nanowire cluster arrays as self-supported electrodes
Source: Royal Society of Chemistry journal article supplement (doi:10.1039/c3nr02972g), 2013-01-01
Supplement: c3nr02972g.pdf [file c3nr02972g.pdf]

## Electronic supplementary information

### **High-performance supercapacitor and lithium-ion battery based on 3D hierarchical NH<sub>4</sub>F-induced nickel cobaltate nanosheet-nanowire cluster arrays as self-supported electrodes**

Yuejiao Chen, Baihua Qu, Lingling Hu, Zhi Xu, Qiuhong Li<sup>b\*</sup> and Taihong Wang<sup>a\*</sup>

<sup>a</sup> *Key Laboratory for Micro-Nano Optoelectronic Devices of Ministry of Education Hunan University. E-mail: thwang@iphy.ac.cn*

<sup>b</sup> *State Key Laboratory for Chemo/Biosensing and Chemometrics Hunan University. E-mail: liqiuhong2004@hotmail.com*

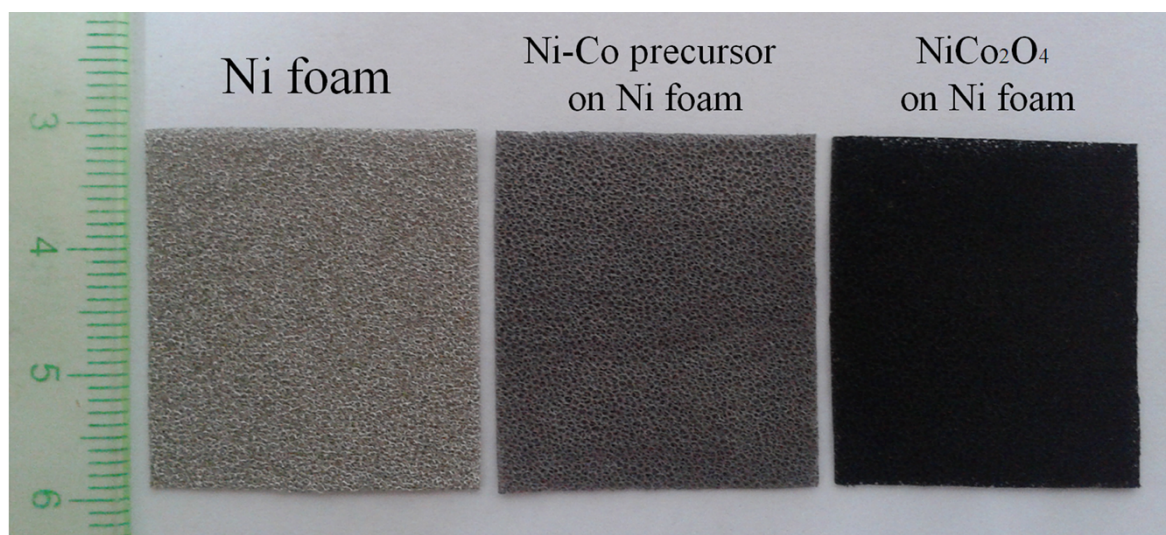

**Figure S1.** Photographs of Ni substrate, nickel cobalt hydroxide precursor on Ni foam and NiCo<sub>2</sub>O<sub>4</sub> on Ni foam.

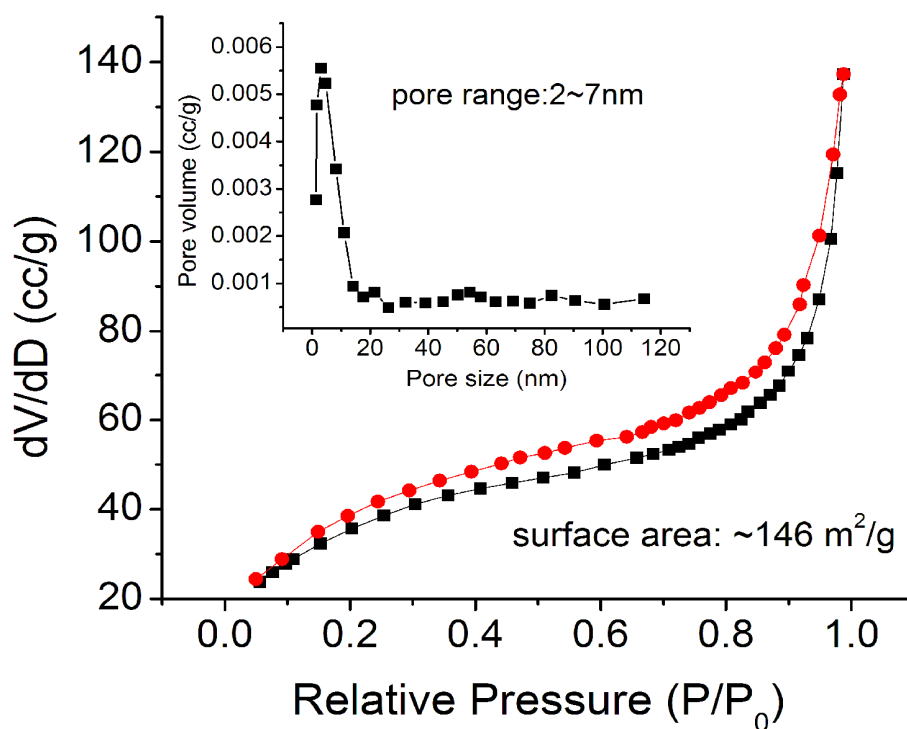

**Figure S2.** N<sub>2</sub> adsorption-desorption isotherm and pore size distribution curves of the NiCo<sub>2</sub>O<sub>4</sub> NSWC scraped from the substrate.

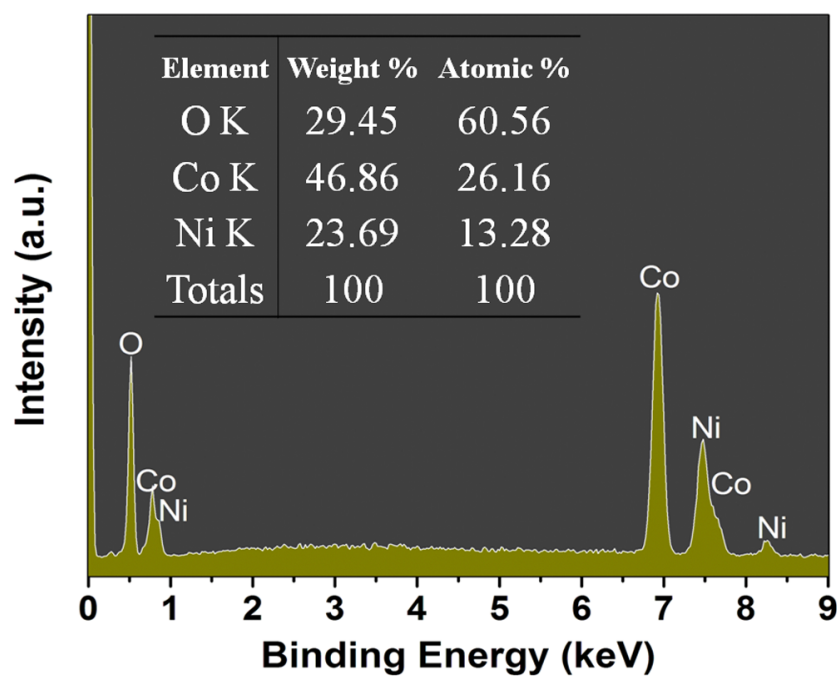

Figure S3. EDX pattern of the NiCo<sub>2</sub>O<sub>4</sub> NSWC arrays.

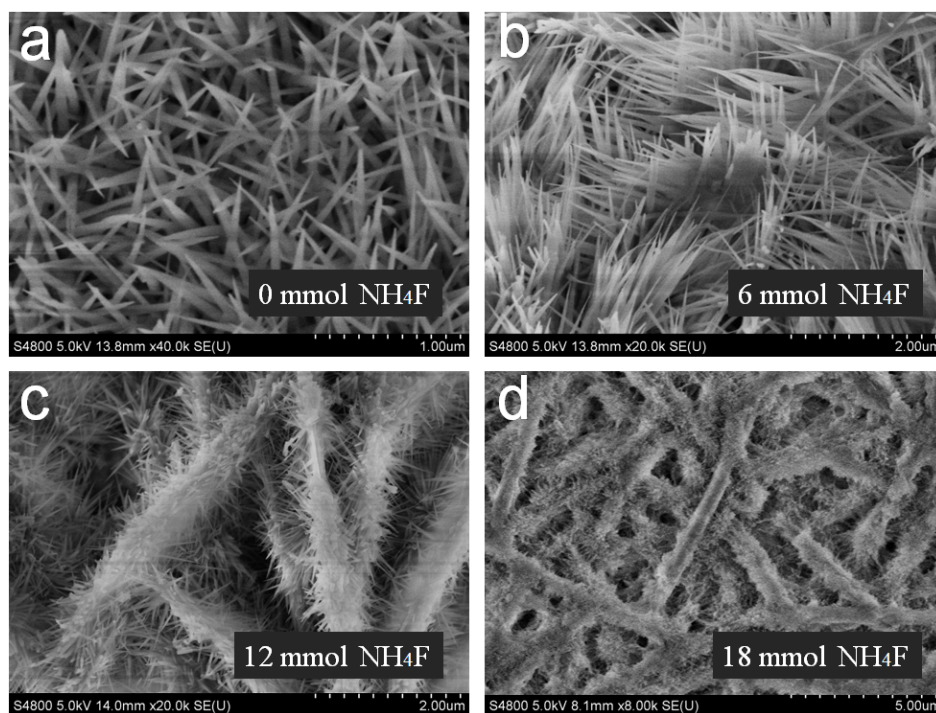

Figure S4. SEM images of the products grown on Ti foil obtained at different concentrations of NH<sub>4</sub>F.

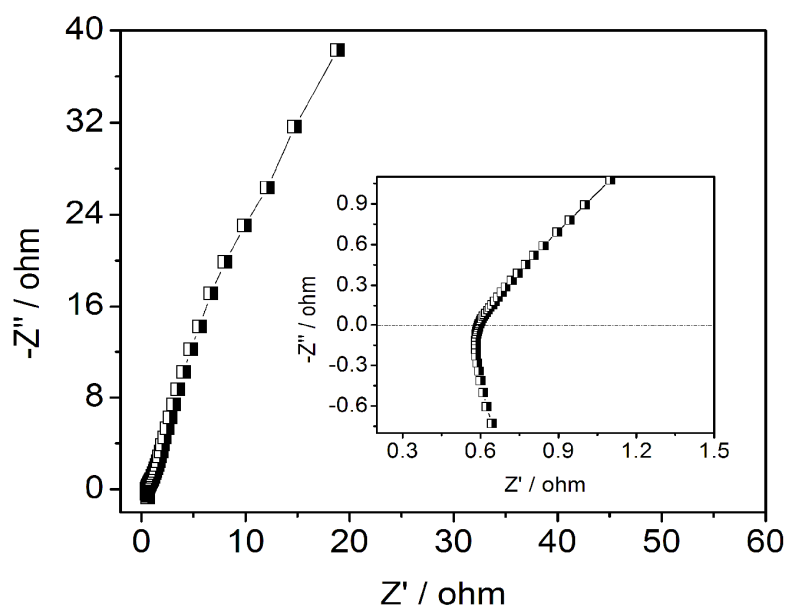

**Figure S5.** EIS plot of the  $\text{NiCo}_2\text{O}_4$  NSWC/Ni foam electrode before cycling tests. The inset is an enlarged curve of the high frequency region.

The EIS data shows a solution resistance  $R_s$  (the intrinsic resistance of the electroactive materials, the contact resistance of material with substrate, the electrolyte resistance) and a charge-transfer resistance  $R_{ct}$ . A vertical line leaning to imaginary axis in the low frequency range represents the solution resistance of about  $0.59 \Omega$ , indicating an ideal electronic conductivity and good electrochemical capacitance of the electrode. At high frequency region, it displays a negligible semicircle and a high slope, revealing the low charge transfer resistance ( $R_{ct}$ ) and fast ion diffusion rate during the redox reaction.

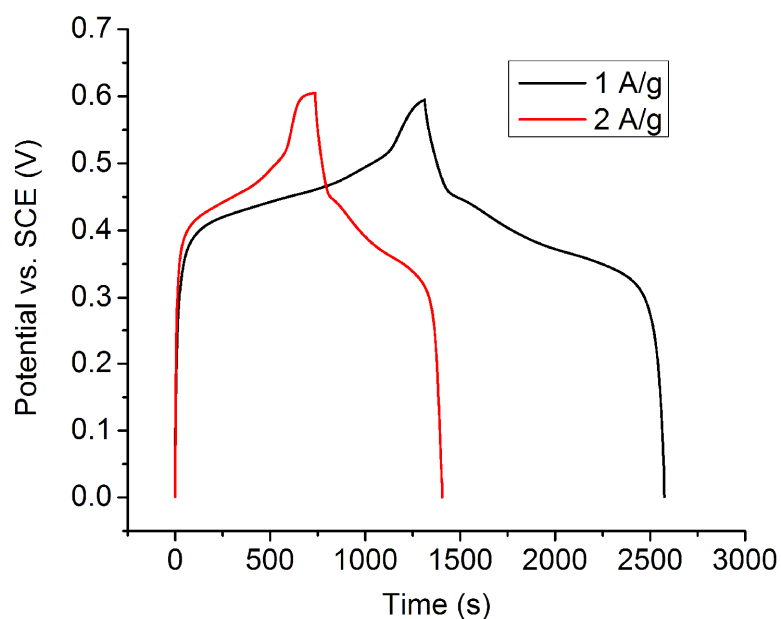

**Figure S6.** The capacitive performance of  $\text{NiCo}_2\text{O}_4$  NSWC/Ni foam electrode at low current densities.

Electronic Supplementary Material (ESI)

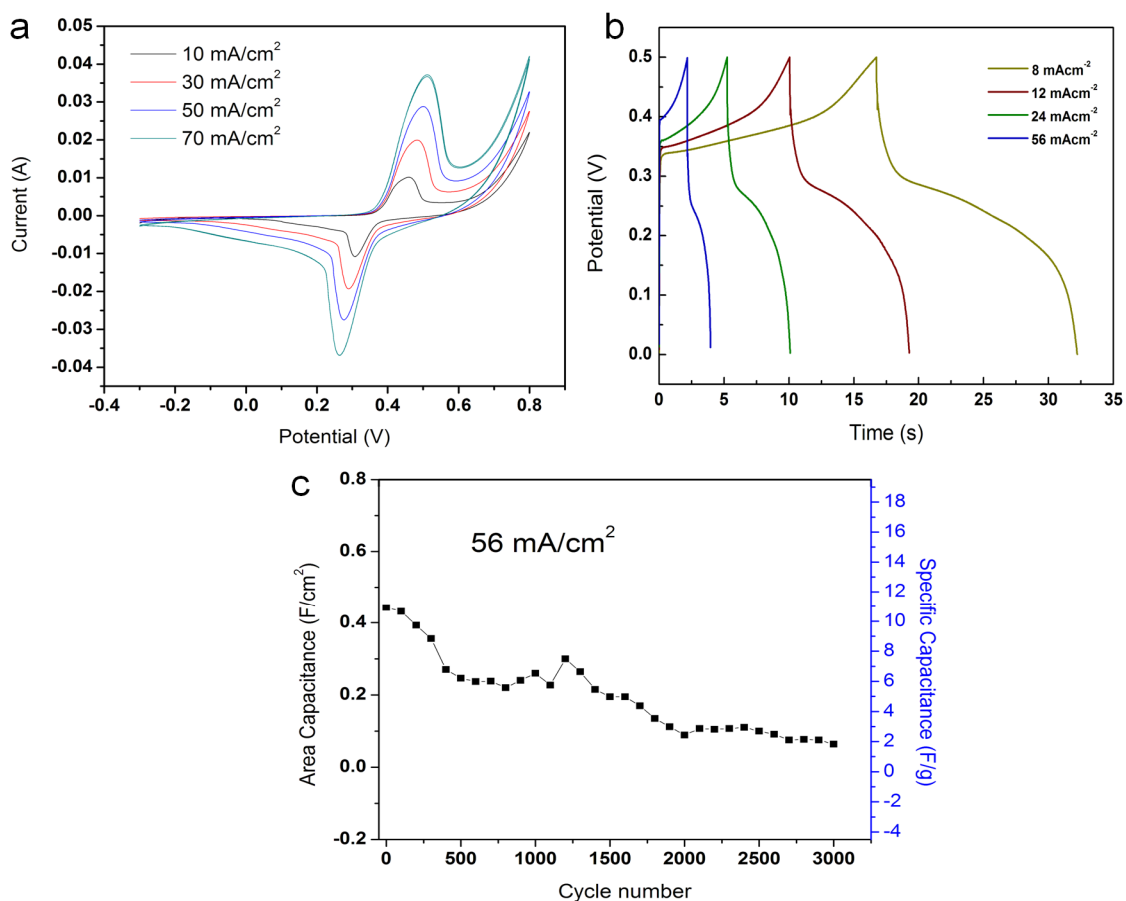

**Figure S7.** Electrochemical property of nickel foam ( $0.0402\text{g}/\text{cm}^2$ ), obtained by hydrothermal treating at  $100\text{ }^\circ\text{C}$  for 5 h and subsequent calcination at  $300\text{ }^\circ\text{C}$  in purity argon for 2 h, was tested independently (a) at different scan rates; (b) at different charge-discharge rates; (c) Cycling performance of discharge electric quantity at the current density of  $56\text{ mA}/\text{cm}^2$  (corresponding to  $1.4\text{ A}/\text{g}$ ).

### Discussion on the contribution of nickel foam

It is clearly shown that the nickel foam shows a redox process which is attributed to the reversible reaction of Ni(II)/Ni(III) formed on the nickel surface. For a typical charge-discharge process of the active material on nickel foam (for example, current density is  $56\text{ mA}/\text{cm}^2$ ), the area capacitance is calculated to be  $0.443\text{ F}/\text{cm}^2$  ( $11\text{ F}/\text{g}$  for specific capacitance). And according to Fig. 5d, it is about  $2.79\text{ F}/\text{cm}^2$  ( $1550\text{ F}/\text{g}$ ). After enduring about 3000 cycles at  $56\text{ mA}/\text{cm}^2$ , the capacitance decreased by 80%. Obviously, the mass capacitance contribution from the nickel foam can be absolutely neglectable. And the area capacitance contribution from the nickel foam can also be neglectable after thousands of cycles.

**Table S1.** Comparison of area capacitance before and after removing the contributed part of Ni foam

| Current density<br>(mA cm <sup>-2</sup> ) | Total capacitance<br>(F cm <sup>-2</sup> ) | Capacitance of<br>Ni foam (F cm <sup>-2</sup> ) | Real capacitance of<br>NiCo <sub>2</sub> O <sub>4</sub> (F cm <sup>-2</sup> ) | Contribution<br>of Ni foam |
|-------------------------------------------|--------------------------------------------|-------------------------------------------------|-------------------------------------------------------------------------------|----------------------------|
| 18                                        | 3.83                                       | 0.492                                           | 3.338                                                                         | 12.84%                     |
| 27                                        | 3.39                                       | 0.473                                           | 2.917                                                                         | 13.95%                     |
| 36                                        | 3.15                                       | 0.461                                           | 2.692                                                                         | 14.54%                     |
| 54                                        | 2.79                                       | 0.443                                           | 2.347                                                                         | 15.87%                     |
| 90                                        | 2.38                                       | 0.413                                           | 1.967                                                                         | 17.35%                     |
| 144                                       | 2.09                                       | 0.376                                           | 1.714                                                                         | 17.99%                     |

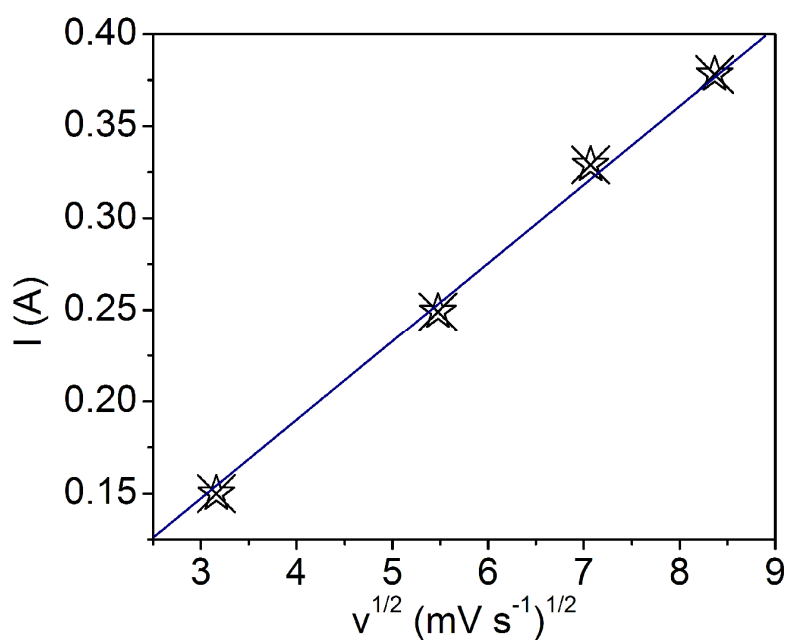

**Figure S8.** Dependence of the current density on  $v^{1/2}$  for the NiCo<sub>2</sub>O<sub>4</sub> nanosheets/Ni foam electrode.

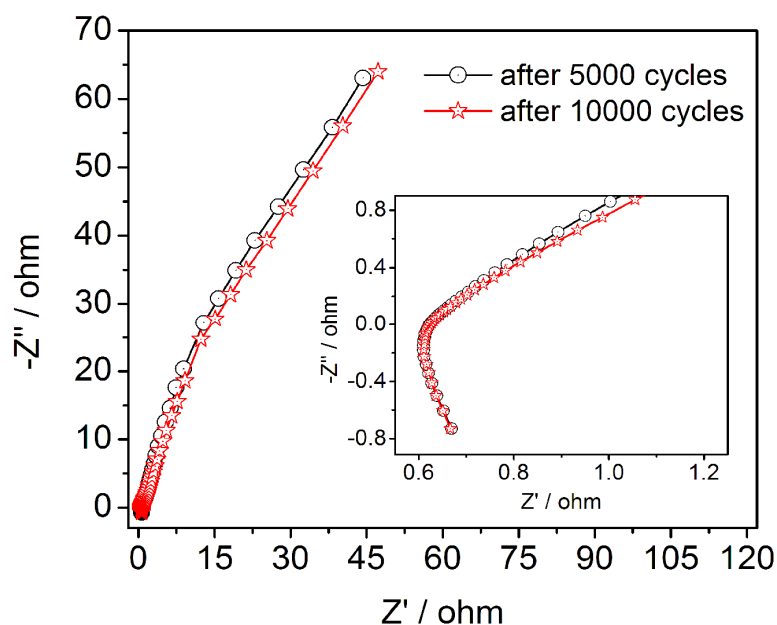

**Figure S9.** Nyquist plots of the EIS spectra for the NiCo<sub>2</sub>O<sub>4</sub> NSWC/Ni foam electrode after 5000 and 10000 cycles, respectively

**Table S2.** Comparison of electrochemical performance

| Nanostructures                                                    | Capacitance (F g <sup>-1</sup> ) | Capacitance (F cm <sup>-2</sup> ) | Current density                     | Capacitance loss         | Reference |
|-------------------------------------------------------------------|----------------------------------|-----------------------------------|-------------------------------------|--------------------------|-----------|
| Single crystal NiCo <sub>2</sub> O <sub>4</sub> nanoneedle arrays | 1118.6                           | 1.01                              | 5.56 mA /cm <sup>2</sup>            | 10.6 % after 2000 cycles | 1         |
| Ultrathin Mesoporous NiCo <sub>2</sub> O <sub>4</sub> Nanosheets  | 1450                             | 1.16                              | 20 A/g (16 mA/cm <sup>2</sup> )     | 6 % after 2300 cycles    | 2         |
| Mesoporous NiCo <sub>2</sub> O <sub>4</sub> Nanosheets            | 1708                             | 2.05                              | 19.8 mA /cm <sup>2</sup> (16.5 A/g) | 6.7% after 3000 cycles   | 3         |
| Hierarchical Co <sub>3</sub> O <sub>4</sub> @Ni-Co-O              | 1525                             | 18.13                             | 2.5 A/g (30 mA/cm <sup>2</sup> )    | 4% after 1000 cycles     | 4         |
| urchin-like NiCo <sub>2</sub> O <sub>4</sub> nanostructures       | 1348                             | /                                 | 15 A/g                              | 9.2 % after 2000 cycles  | 5         |
| Hierarchical porous NiCo <sub>2</sub> O <sub>4</sub> nanowires    | 743                              | /                                 | 1 A/g                               | 6.2 % after 3000 cycles  | 6         |
| NiCo <sub>2</sub> O <sub>4</sub> -reduced graphene oxide          | 615                              | /                                 | 20 A/g                              | /                        | 7         |

Electronic Supplementary Material (ESI)

---

|                                              |      |      |                                   |                               |              |
|----------------------------------------------|------|------|-----------------------------------|-------------------------------|--------------|
| composites                                   |      |      |                                   |                               |              |
| NiCo <sub>2</sub> O <sub>4</sub> NSWC arrays | 1752 | 3.15 | 36 mA/cm <sup>2</sup><br>(20 A/g) | 6.2% after<br>10200<br>cycles | This<br>work |

- 1 G. Q. Zhang, H. B. Wu, H. E. Hoster, M. B. Chan-park, X. W. Lou, *Energy Environ. Sci.*, 2012, **5**, 9453.
- 2 C. Z. Yuan, J. Y. Li, L. R. Hou, X. G. Zhang, L. F. Shen, X. W. Lou, *Adv. Funct. Mater.*, 2012, **22**, 4592.
- 3 G. Q. Zhang, X. W. Lou, *Adv. Mater.*, 2013, **25**, 976-979.
- 4 Z. Y. Lu, Q. Yang, W. Zhu, Z. Chang, J. F. Liu, X. M. Sun, D. G. Evans, X. duan, *Nano Res.*, 2012, **5**, 369.
- 5 Q. F. Wang, B. Liu, X. F. Wang, S. H. Ran, L. M. Wang, D. Chen, G. Z. Shen, *J. Mater. Chem.*, 2012, **22**, 21647.
- 6 H. Jiang, J. Ma, C. Z. Li, *Chem. Commun.*, 2012, **48**, 4465.
- 7 W. W. Huan, Z. A. Hu, Y. Q. Chang, Y. L. Chen, H. Y. Wu, Z. Y. Zhang Y. Y. Yang, *J. Mater. Chem.*, 2011, **21**, 10504.
